# Supplementary material for: Differential upregulation in DRG neurons of an α2δ-1 splice variant with a lower affinity for gabapentin after peripheral sensory nerve injury
Source: PubMed Central journal article supplement (PMC3988960; doi:10.1016/j.pain.2013.12.001), 2014-03

**A**

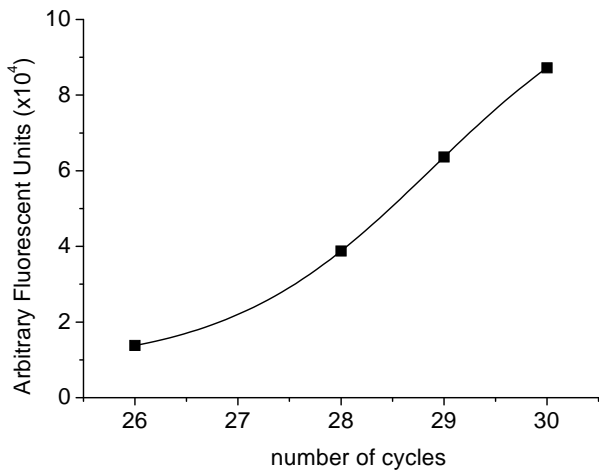

**B**

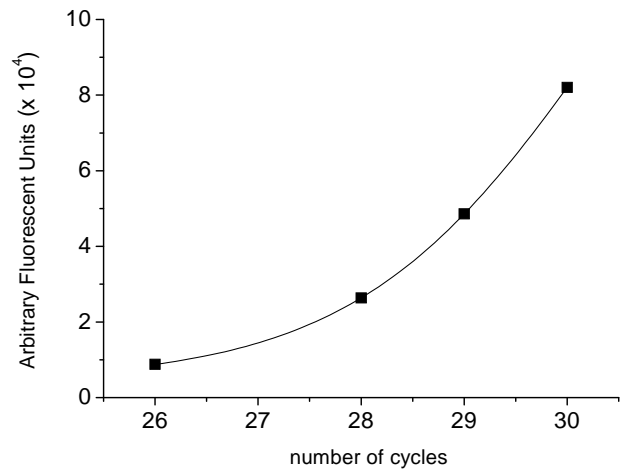

**C**

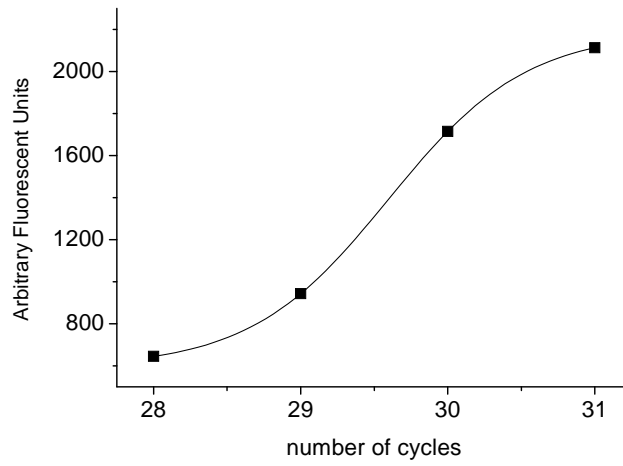

**D**

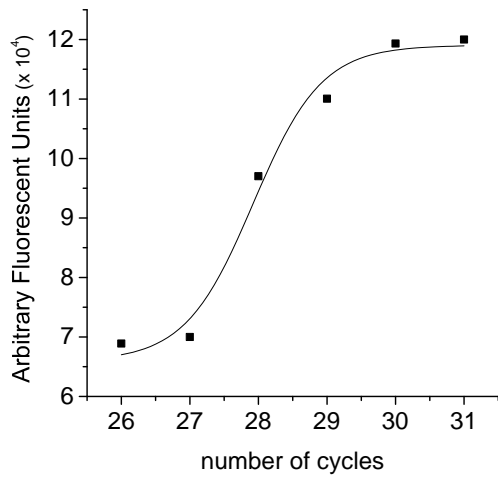

**E**

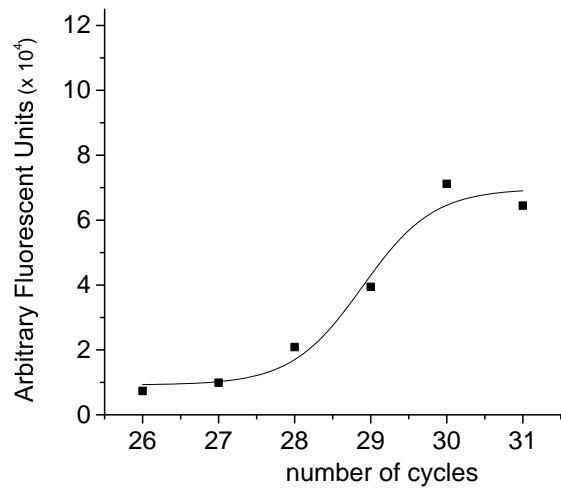

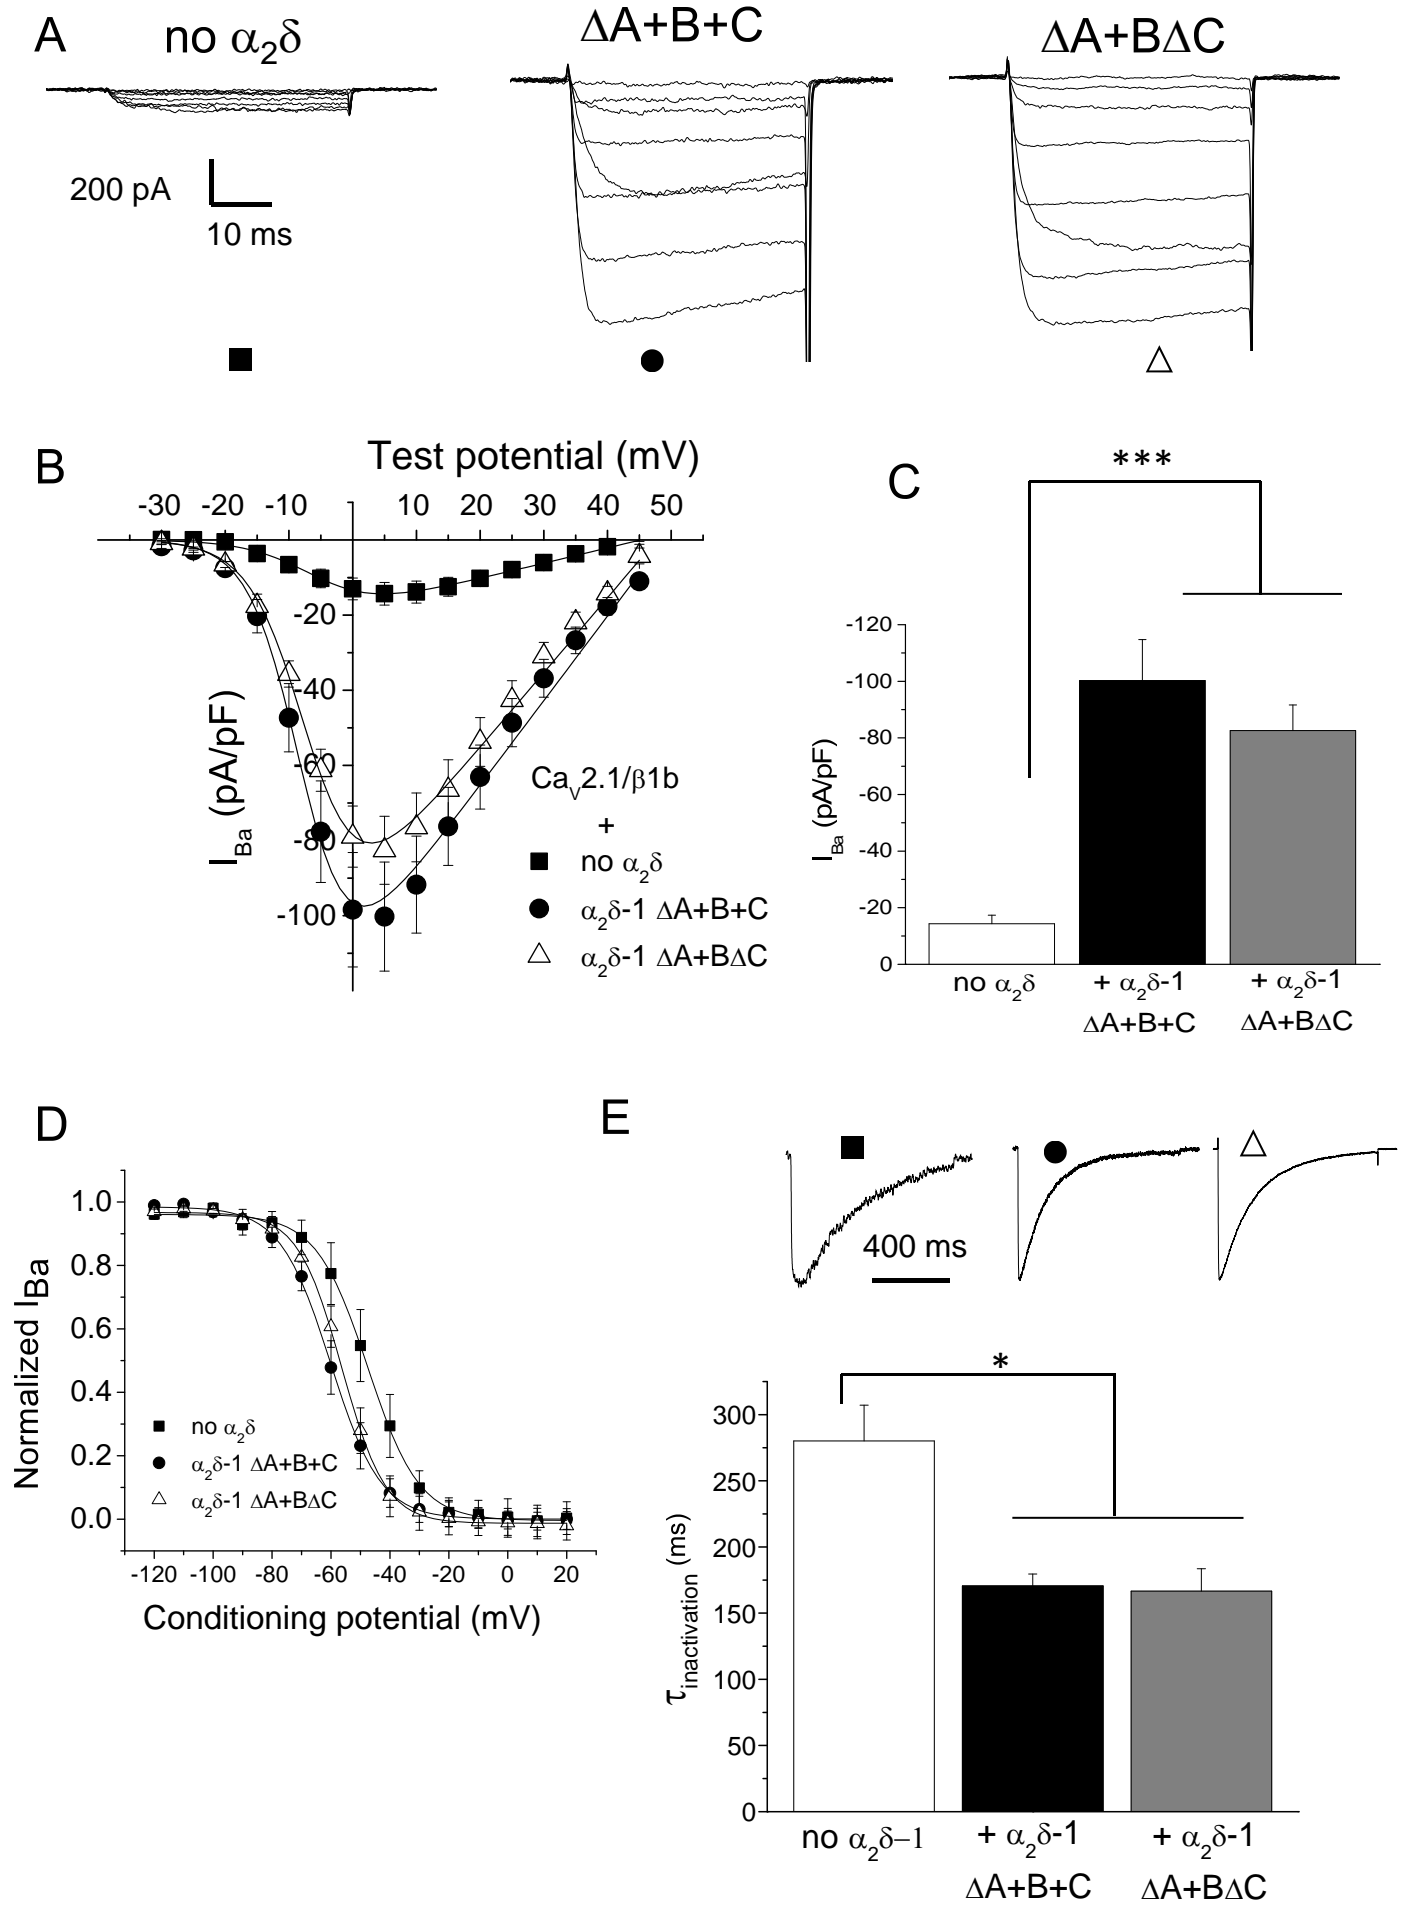

Supplement: mmc1.pdf [file mmc1.pdf]
